# Supplementary material for: Phosphanyl-substituted π-excess σ2P heterocycles: Coordination behaviour of 2-di-tert-butylphosphanyl-1-neopentyl-1,3-benzazaphosphole towards CuCl, HgCl2 and [Rh(COD)2]BF4
Source: Royal Society of Chemistry journal article supplement (doi:10.1039/c3ra43706j), 2013-01-01
Supplement: c3ra43706j.pdf [file c3ra43706j.pdf]

## Electronic supplementary Information

### **Phosphanyl-substituted $\pi$ -excess $\sigma^2\text{P}$ heterocycles: Coordination behaviour of 2-di-*tert*-butylphosphanyl-1-neopentyl-1,3-benzazaphosphole towards $\text{CuCl}$ , $\text{HgCl}_2$ and $[\text{Rh}(\text{COD})_2]\text{BF}_4$**

Mohammed Ghalib,<sup>a</sup> Peter G. Jones,<sup>b</sup> Gottfried J. Palm,<sup>c</sup> Joachim W. Heinicke,<sup>\*a</sup>

<sup>a</sup> *Institut für Biochemie (Anorganische Chemie), Ernst-Moritz-Arndt-Universität Greifswald, 17487 Greifswald, Germany*

Corresponding author: Fax: +49 3834864377. Email: [heinicke@uni-greifswald.de](mailto:heinicke@uni-greifswald.de)

<sup>b</sup> *Institut für Anorganische und Analytische Chemie der Technischen Universität Braunschweig, 38023 Braunschweig, Germany*

<sup>c</sup> *Institut für Biochemie (Molekulare Strukturbiologie), Ernst-Moritz-Arndt-Universität Greifswald, 17487 Greifswald, Germany*

1.  $^{13}\text{C}$  and  $^{31}\text{P}$  NMR Spectra of complexes 2-4
2. Calculated and observed isotopic pattern of  $[\text{M-Cl}]^+$  in the HRMS spectrum of 3.
3. Tables of atomic positions, bond lengths and angles of 3 and 4

# 1. NMR Spectra

## <sup>13</sup>C NMR Spectrum of 2.

|                        |                      |                   |                         |                        |                      |
|------------------------|----------------------|-------------------|-------------------------|------------------------|----------------------|
| Acquisition Time (sec) | 1.3631               | Comment           | M149cua (13C-NMR, C6D6) | Date                   | 11 Jul 2011 21:39:44 |
| Date Stamp             | 11 Jul 2011 21:39:44 |                   |                         |                        |                      |
| File Name              |                      |                   |                         |                        |                      |
| Frequency (MHz)        | 100.63               | Nucleus           | <sup>13</sup> C         | Origin                 | spect                |
| Original Points Count  | 32768                | Owner             | nmsu                    | Points Count           | 32768                |
| Receiver Gain          | 362.00               | SW(cyclical) (Hz) | 24038.46                | Solvent                | BENZENE-d6           |
| Spectrum Type          | STANDARD             | Sweep Width (Hz)  | 24037.73                | Temperature (degree C) | 26.460               |
|                        |                      |                   |                         | Pulse Sequence         | zgpg30               |
|                        |                      |                   |                         | Spectrum Offset (Hz)   | 10133.3125           |

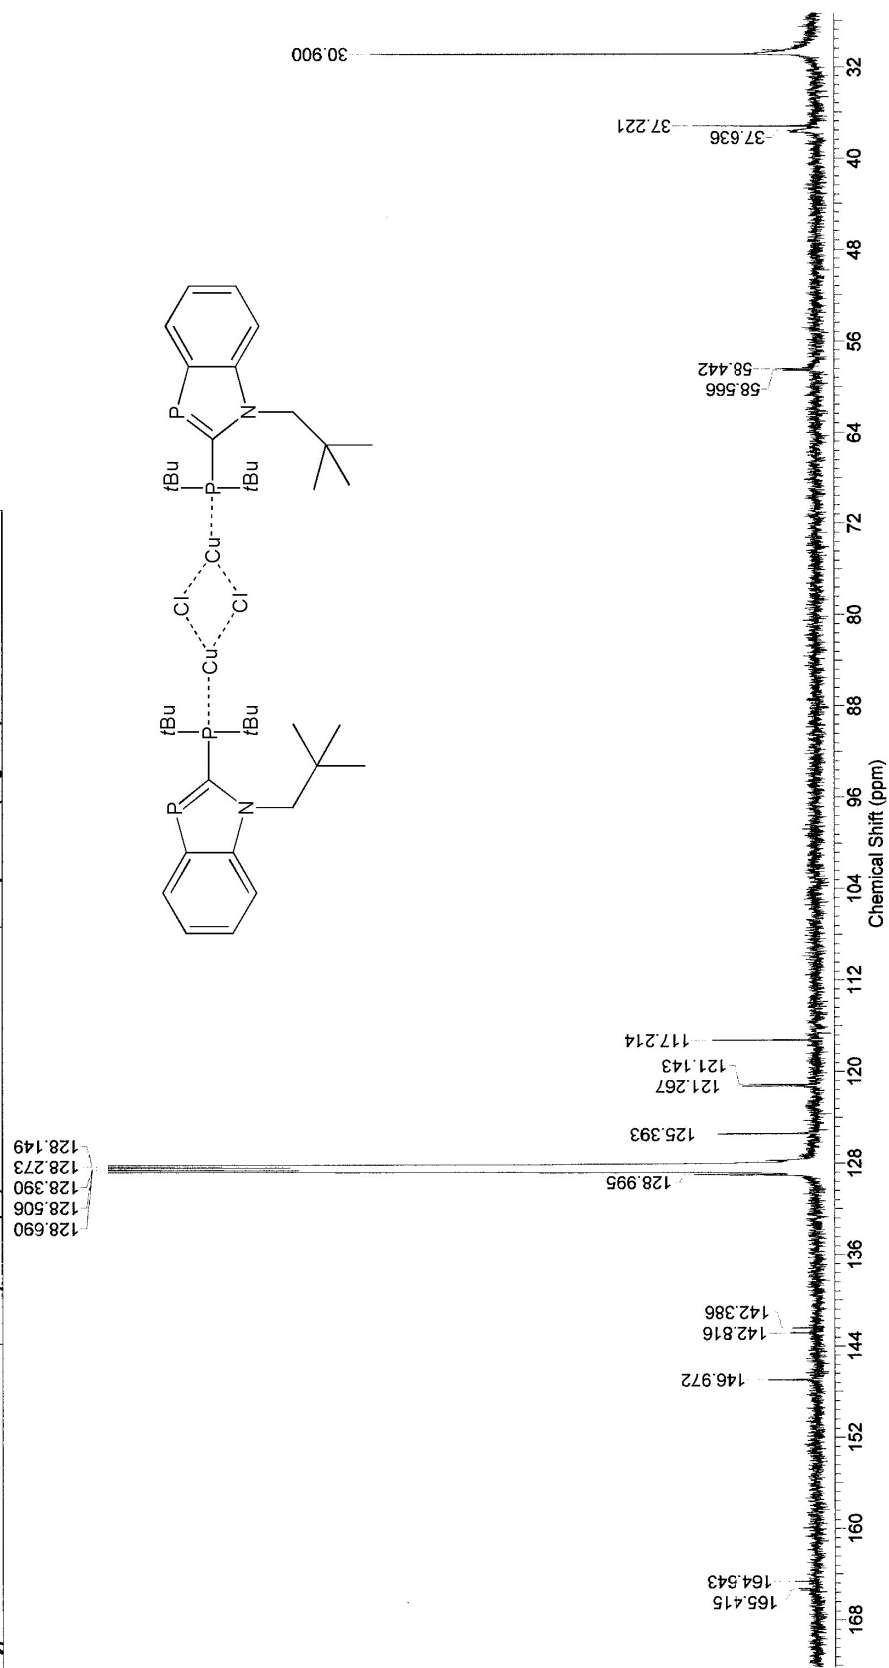

<sup>31</sup>P NMR Spectrum of **2**.

|                        |                      |                   |                                                                  |                        |                      |
|------------------------|----------------------|-------------------|------------------------------------------------------------------|------------------------|----------------------|
| Acquisition Time (sec) | 0.5112               | Comment           | M149cua (31P-NMR, C6D6)                                          | Date                   | 11 Jul 2011 12:42:08 |
| Date Stamp             | 11 Jul 2011 12:42:08 | File Name         | C:\DOKUMENTE UND EINSTELLUNGEN\GALIBDESKTOP\M149CUA\10\PDATA\11R | Origin                 | spect                |
| Frequency (MHz)        | 162.00               | Nucleus           | 31P                                                              | Pulse Sequence         | zgpg30               |
| Original Points Count  | 32768                | Owner             | nmisu                                                            | Spectrum Offset (Hz)   | -8099.7148           |
| Receiver Gain          | 2050.00              | SW(cyclical) (Hz) | 64102.56                                                         | Solvent                | BENZENE-d6           |
| Spectrum Type          | STANDARD             | Sweep Width (Hz)  | 64100.61                                                         | Temperature (degree C) | 26.260               |

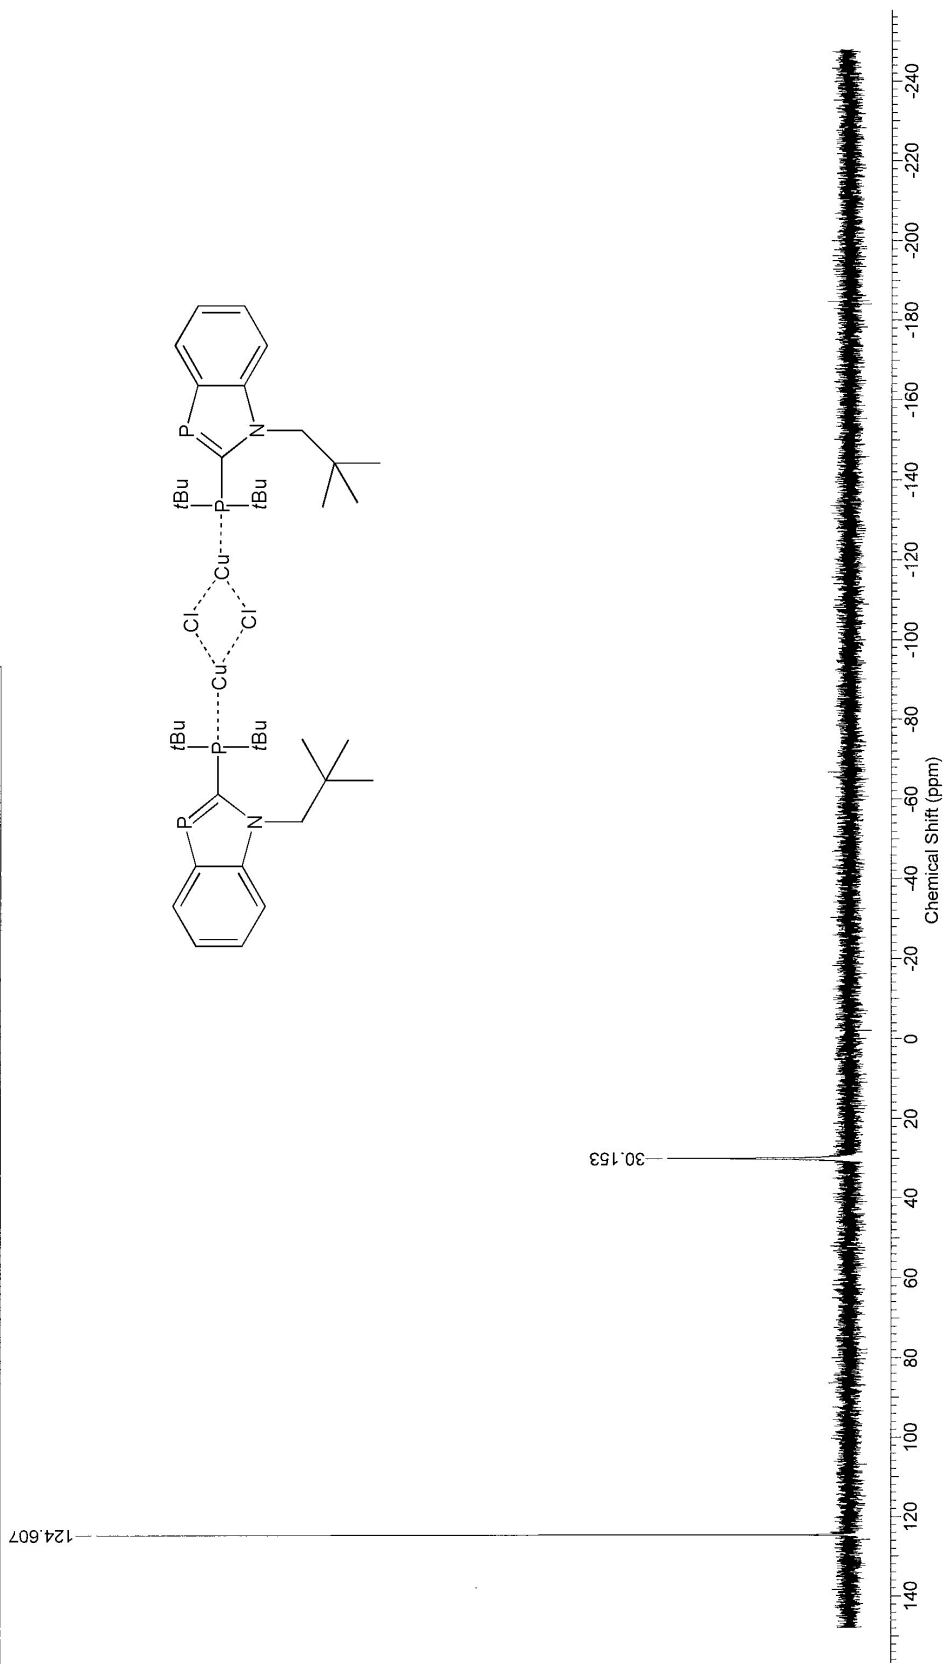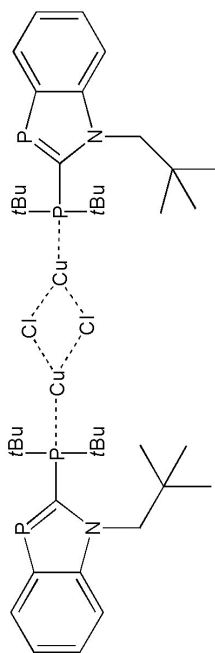

<sup>13</sup>C NMR Spectrum of **3**.

|                               |                      |                               |                                                                                                            |
|-------------------------------|----------------------|-------------------------------|------------------------------------------------------------------------------------------------------------|
| <b>Acquisition Time (sec)</b> | 0.7537               | <b>Comment</b>                | Ghalib:M149HgCX2 13C(1H)-NMR-Spektrum LM:THF-d8 Referenz:LM= 25.2 ppm Messzeit: 16 h EMAU, AVANCE II - 300 |
| <b>Date</b>                   | 03 May 2012 08:09:04 | <b>Date Stamp</b>             | 03 May 2012 08:09:04                                                                                       |
| <b>File Name</b>              |                      |                               |                                                                                                            |
| <b>Frequency (MHz)</b>        | 75.47                | <b>Nucleus</b>                | <sup>13</sup> C                                                                                            |
| <b>Origin</b>                 | spect                | <b>Original Points Count</b>  | 16384                                                                                                      |
| <b>Points Count</b>           | 16384                | <b>Pulse Sequence</b>         | zpgg30                                                                                                     |
| <b>SW(cyclical) (Hz)</b>      | 21739.13             | <b>Solvent</b>                | THF                                                                                                        |
| <b>Spectrum Type</b>          | STANDARD             | <b>Sweep Width (Hz)</b>       | 21737.80                                                                                                   |
|                               |                      | <b>Number of Transients</b>   | 16602                                                                                                      |
|                               |                      | <b>Owner</b>                  | nmr                                                                                                        |
|                               |                      | <b>Receiver Gain</b>          | 32800.00                                                                                                   |
|                               |                      | <b>Spectrum Offset (Hz)</b>   | 8435.8604                                                                                                  |
|                               |                      | <b>Temperature (degree C)</b> | 25.100                                                                                                     |

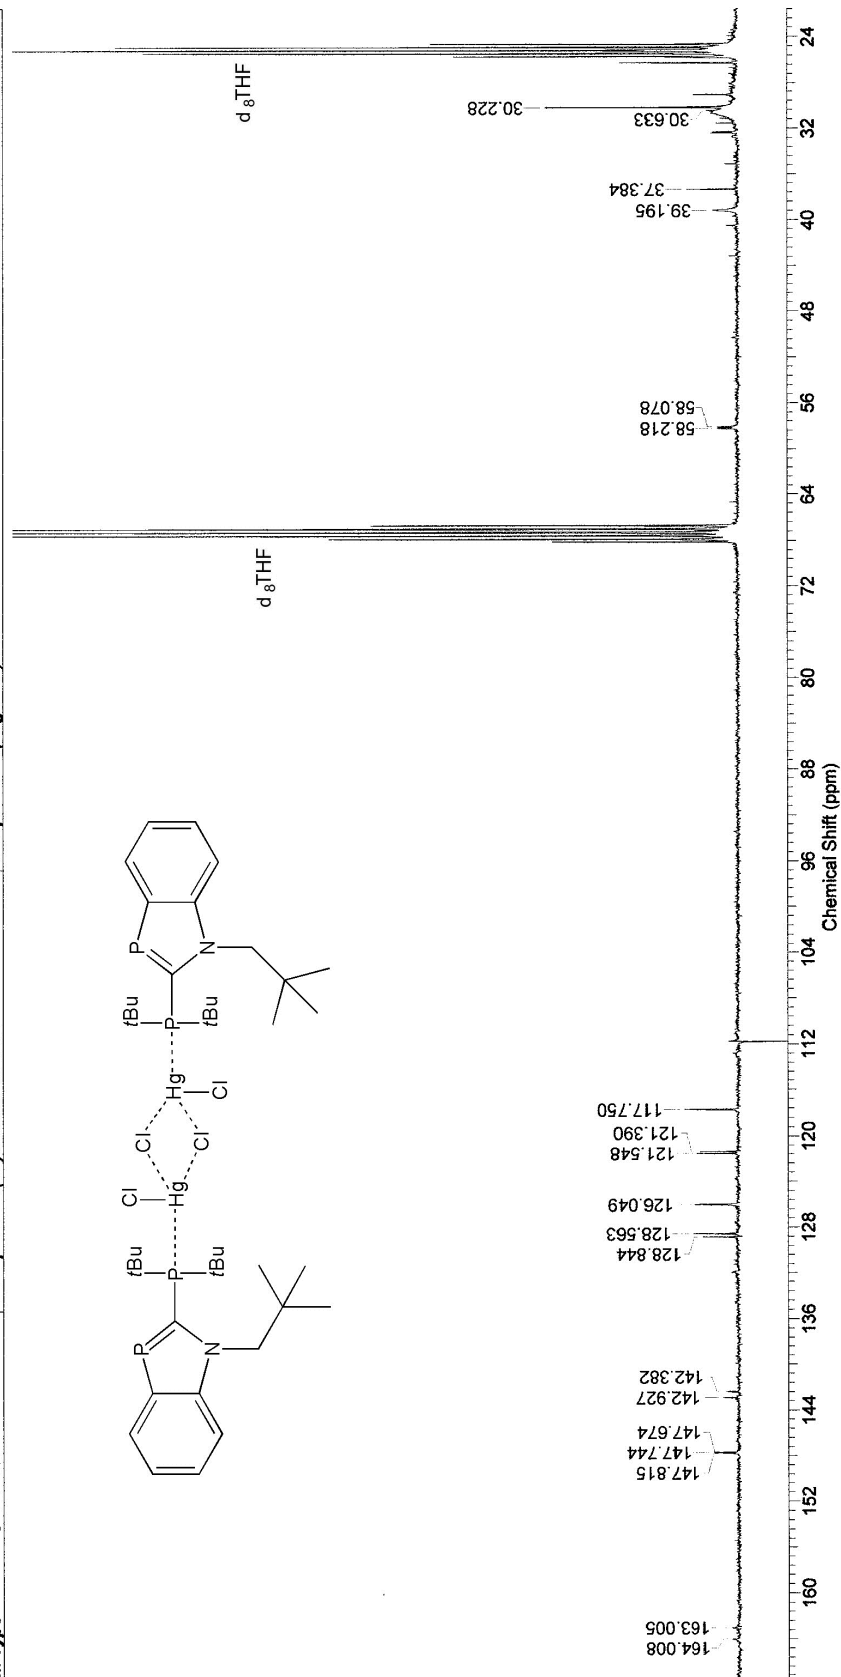

$^{31}\text{P}$  NMR Spectrum of **3** (free ligand **1**:  $\delta = 20.0, 114.8$  ( $^2J_{\text{PP}} = 17.2$  Hz [1]).

|                               |                                                                                                                                                         |
|-------------------------------|---------------------------------------------------------------------------------------------------------------------------------------------------------|
| <b>Acquisition Time (sec)</b> | 0.3277                                                                                                                                                  |
| <b>Comment</b>                | M.Ghallib: M149HgC2 31P{1H}-Spektrum Loesungsmittel: THF-d8 Ref.: extern, H3PO4 = 0.0 ppm (+/- 0.3) Messzeit: 10 min. EMAU Greifswald - Avance II - 300 |
| <b>Date</b>                   | 02 May 2012 12:54:56                                                                                                                                    |
| <b>Date Stamp</b>             | 02 May 2012 12:54:56                                                                                                                                    |
| <b>File Name</b>              |                                                                                                                                                         |
| <b>Frequency (MHz)</b>        | 121.49                                                                                                                                                  |
| <b>Origin</b>                 | spect                                                                                                                                                   |
| <b>Points Count</b>           | 32768                                                                                                                                                   |
| <b>SW(cyclical) (Hz)</b>      | 50000.00                                                                                                                                                |
| <b>Spectrum Type</b>          | STANDARD                                                                                                                                                |
| <b>Nucleus</b>                | $^{31}\text{P}$                                                                                                                                         |
| <b>Original Points Count</b>  | 16384                                                                                                                                                   |
| <b>Pulse Sequence</b>         | zgpg30                                                                                                                                                  |
| <b>Solvent</b>                | THF                                                                                                                                                     |
| <b>Sweep Width (Hz)</b>       | 49998.47                                                                                                                                                |
| <b>Number of Transients</b>   | 90                                                                                                                                                      |
| <b>Owner</b>                  | nmr                                                                                                                                                     |
| <b>Receiver Gain</b>          | 23100.00                                                                                                                                                |
| <b>Spectrum Offset (Hz)</b>   | 499.9960                                                                                                                                                |
| <b>Temperature (degree C)</b> | 25.800                                                                                                                                                  |

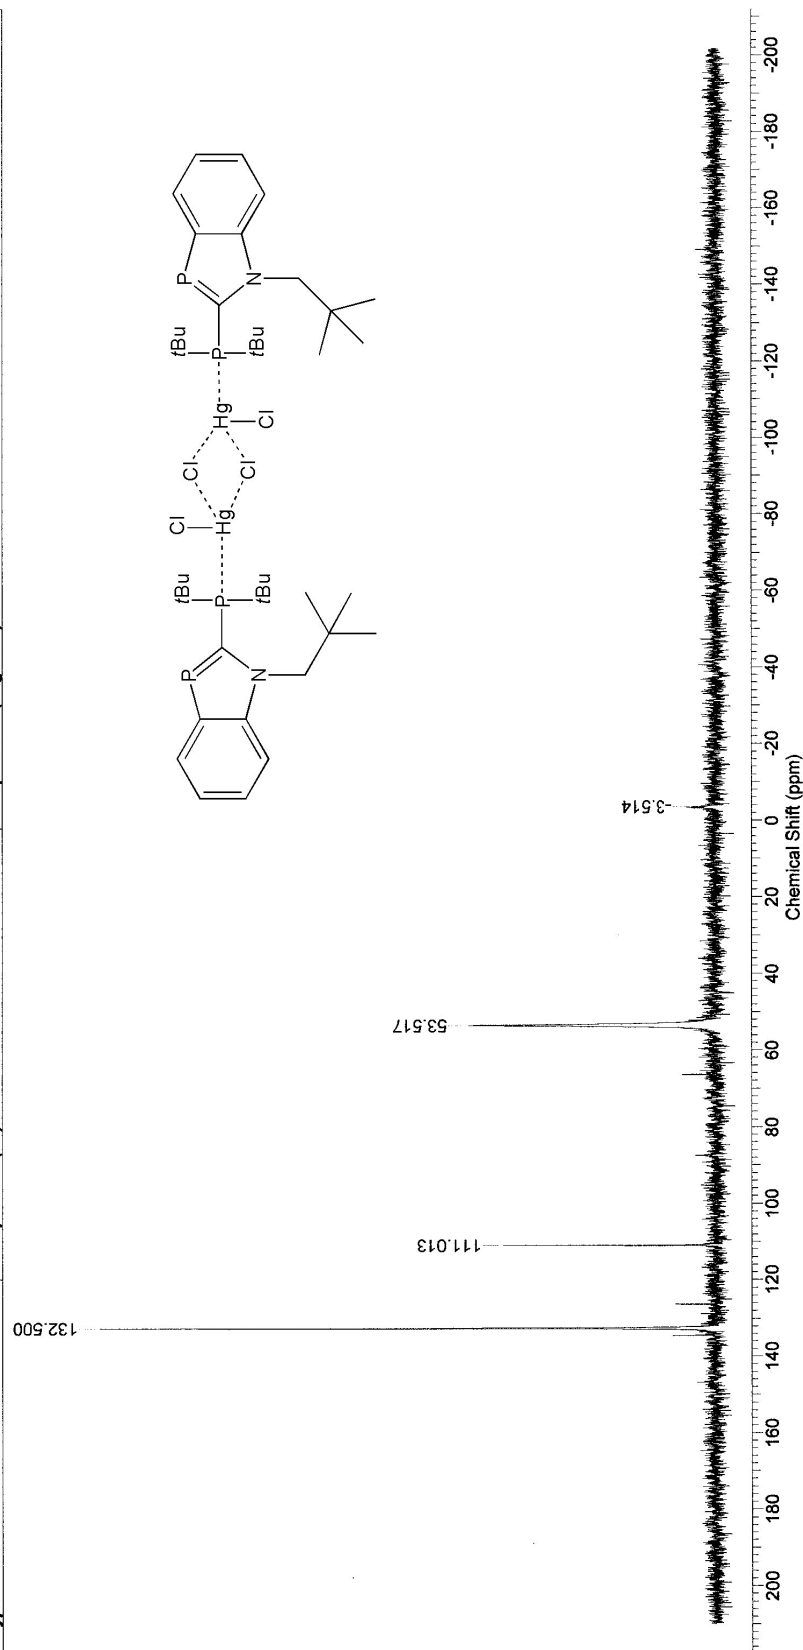

[1] B. R. Aluri, M. K. Kindermann, P. G. Jones, I. Dix, J. W. Heinicke, *Inorg. Chem.*, **2008**, *47*, 6900-6912.

[2] P. E. Garrou, *Chem. Rev.* **1981**, *81*, 229-266.

<sup>13</sup>C NMR Spectrum of 4.

|                               |                                                                                                                                                                                                                                                                      |                               |                                                                                                                    |
|-------------------------------|----------------------------------------------------------------------------------------------------------------------------------------------------------------------------------------------------------------------------------------------------------------------|-------------------------------|--------------------------------------------------------------------------------------------------------------------|
| <b>Acquisition Time (sec)</b> | 0.7537                                                                                                                                                                                                                                                               | <b>Comment</b>                | M. Ghallib: M149Rhboxx 13C{1H}-NMR-Spektrum LM: C6D6 Referenz: LM = 128.7 ppm Messzeit: 63 h EMAU, AVANCE II - 300 |
| <b>Date</b>                   | 08 May 2012 09:04:32                                                                                                                                                                                                                                                 | <b>Date Stamp</b>             | 08 May 2012 09:04:32                                                                                               |
| <b>File Name</b>              | C:\Users\JacerHeinicke\Documents\Arbeitsdateien_130328\Fo-G15 P\Mitarbeiter& Kooperationen\Ghallib\ub5 BAP- <sup>t</sup> Bu <sub>2</sub> P-CuCl+HgCl <sub>2</sub> +Rh(COD)BF <sub>4</sub> NMR <sup>t</sup> Bu <sub>2</sub> PNpBAP komplex\GH_M149Rhboxx14\pdata\111r |                               |                                                                                                                    |
| <b>Frequency (MHz)</b>        | 75.47                                                                                                                                                                                                                                                                | <b>Nucleus</b>                | <sup>13</sup> C                                                                                                    |
| <b>Origin</b>                 | spect                                                                                                                                                                                                                                                                | <b>Original Points Count</b>  | 16384                                                                                                              |
| <b>Points Count</b>           | 16384                                                                                                                                                                                                                                                                | <b>Pulse Sequence</b>         | zgpg30                                                                                                             |
| <b>SW(cyclical) (Hz)</b>      | 21739.13                                                                                                                                                                                                                                                             | <b>Solvent</b>                | BENZENE-d6                                                                                                         |
| <b>Spectrum Type</b>          | STANDARD                                                                                                                                                                                                                                                             | <b>Sweep Width (Hz)</b>       | 21737.80                                                                                                           |
|                               |                                                                                                                                                                                                                                                                      | <b>Number of Transients</b>   | 25657                                                                                                              |
|                               |                                                                                                                                                                                                                                                                      | <b>Owner</b>                  | nmr                                                                                                                |
|                               |                                                                                                                                                                                                                                                                      | <b>Receiver Gain</b>          | 32800.00                                                                                                           |
|                               |                                                                                                                                                                                                                                                                      | <b>Spectrum Offset (Hz)</b>   | 8438.2451                                                                                                          |
|                               |                                                                                                                                                                                                                                                                      | <b>Temperature (degree C)</b> | 25.200                                                                                                             |

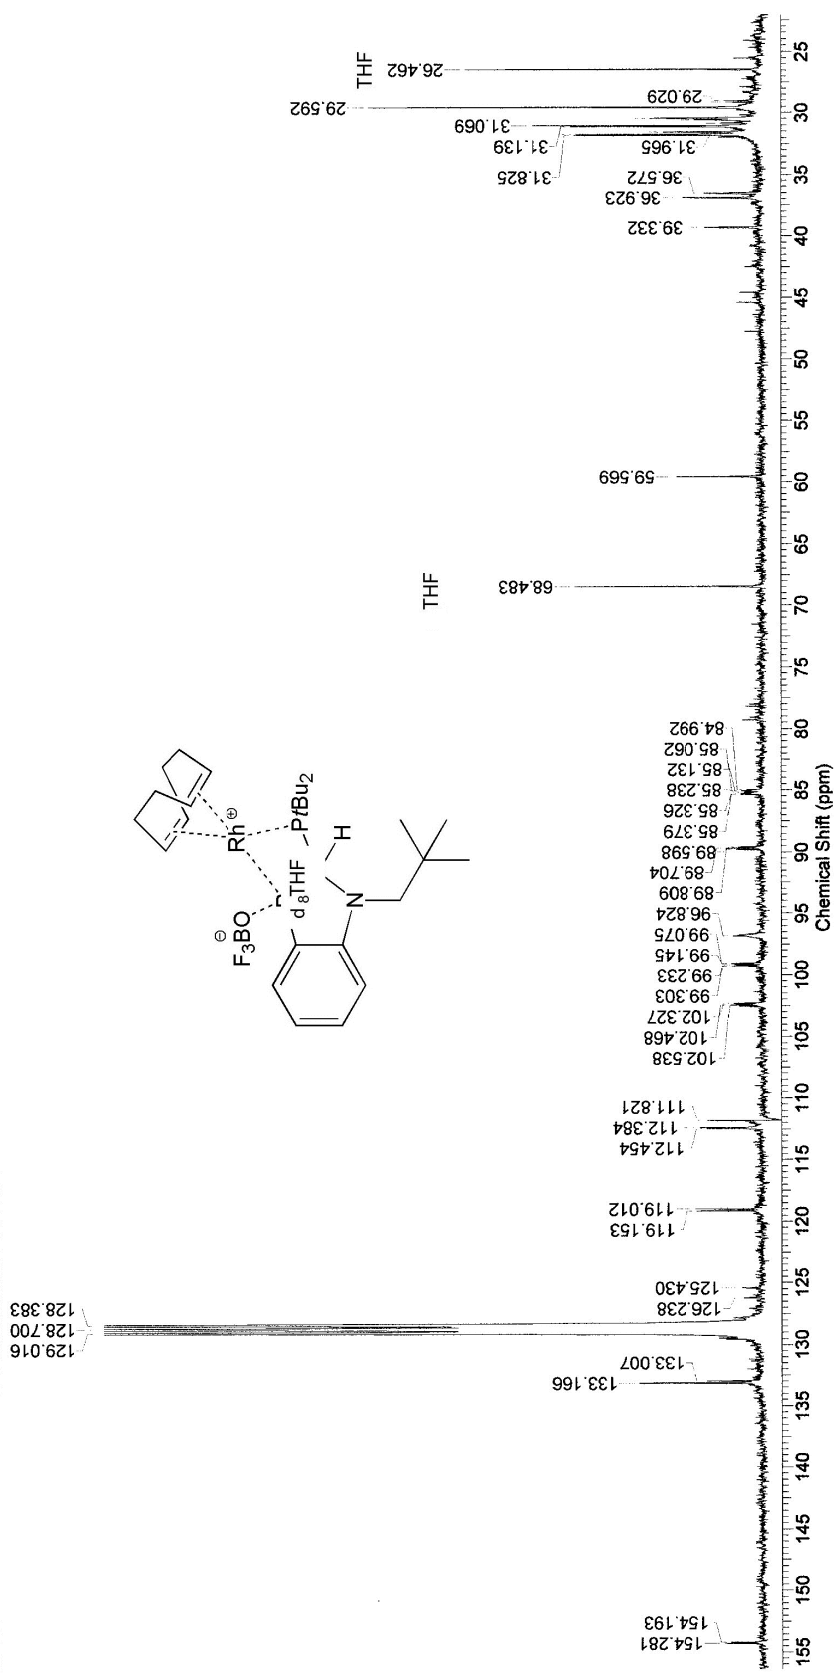

<sup>31</sup>P NMR Spectrum of **4**.

|                        |                                                                                                                                                  |                       |            |                        |          |
|------------------------|--------------------------------------------------------------------------------------------------------------------------------------------------|-----------------------|------------|------------------------|----------|
| Acquisition Time (sec) | 0.3277                                                                                                                                           | Nucleus               | 31P        | Number of Transients   | 256      |
| Comment                | Ghailb:M149Rhbox 31P(1H)-Spektrum Lösungsmittel: C6D6 Ref.: extern, H3PO4 = 0.0 ppm (+/- 0.3) Messzeit:10 min. EMAU Greifswald - Avance II - 300 | Original Points Count | 16384      | Owner                  | nmr      |
| Date                   | 04 May 2012 08:34:40                                                                                                                             | Pulse Sequence        | zpgg30     | Receiver Gain          | 23100.00 |
| File Name              |                                                                                                                                                  | Solvent               | BENZENE-d6 | Spectrum Offset (Hz)   | 499.9960 |
| Frequency (MHz)        | 121.49                                                                                                                                           | Sweep Width (Hz)      | 49998.47   | Temperature (degree C) | 25.100   |
| Origin                 | spect                                                                                                                                            |                       |            |                        |          |
| Points Count           | 32768                                                                                                                                            |                       |            |                        |          |
| SW(cyclical) (Hz)      | 50000.00                                                                                                                                         |                       |            |                        |          |
| Spectrum Type          | STANDARD                                                                                                                                         |                       |            |                        |          |

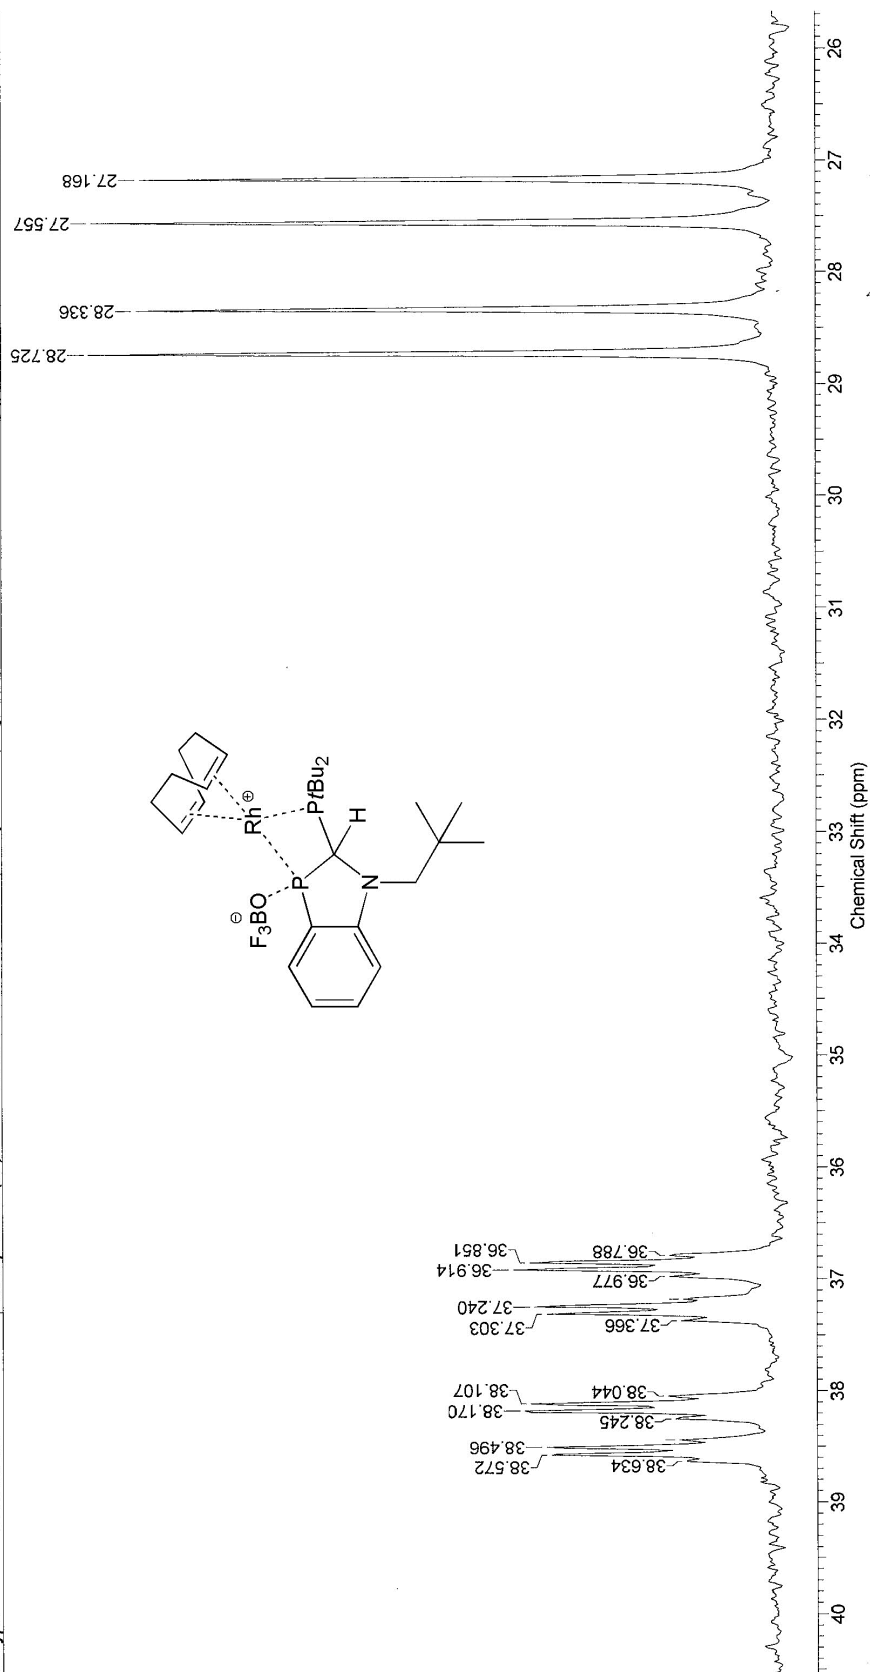

## 2. Calculated (above) and observed (below) isotopic pattern of [M-Cl]<sup>+</sup> in the HRMS spectrum of 3.

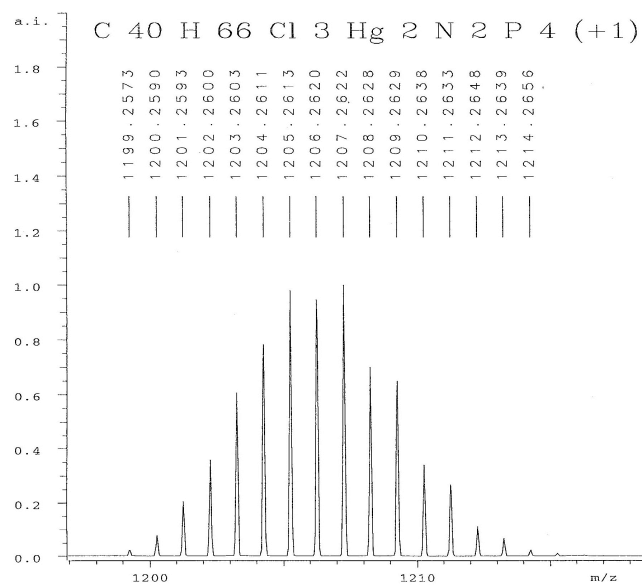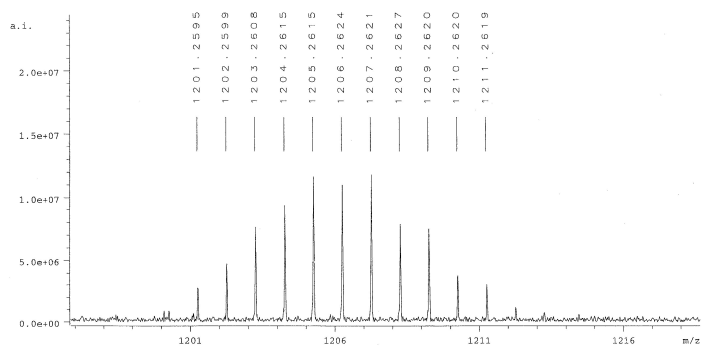



### 3. Tables of atomic coordinates, bond lengths and angles of **3** and **4**

Table 1. Atomic coordinates ( $\times 10^4$ ) and equivalent isotropic displacement parameters of **3** ( $\text{\AA}^2 \times 10^3$ ).  $U(\text{eq})$  is defined as one third of the trace of the orthogonalized  $U_{ij}$  tensor.

|       | x          | y          | z          | U(eq)    |
|-------|------------|------------|------------|----------|
| Hg    | 881.5(1)   | 410.1(1)   | 1639.8(1)  | 12.8(1)  |
| Cl(1) | -925.9(6)  | -752.9(5)  | 2524.2(4)  | 20.7(1)  |
| Cl(2) | -535.5(5)  | 1316.8(4)  | 273.3(4)   | 14.8(1)  |
| P(1)  | 3425.7(5)  | 1251.8(4)  | 2385.3(4)  | 9.9(1)   |
| N(1)  | 3317.7(17) | 2204.8(14) | 4633.5(14) | 10.9(3)  |
| C(2)  | 3991(2)    | 2275.2(17) | 3697.6(16) | 11.8(4)  |
| P(3)  | 5728.9(6)  | 3160.3(5)  | 4001.0(5)  | 15.4(1)  |
| C(3A) | 5579(2)    | 3388.4(17) | 5439.4(17) | 13.3(4)  |
| C(4)  | 6628(2)    | 4007.0(18) | 6363.4(18) | 16.1(4)  |
| C(5)  | 6305(2)    | 4048.1(18) | 7430.9(18) | 17.1(4)  |
| C(6)  | 4933(2)    | 3467.7(18) | 7599.6(18) | 16.5(4)  |
| C(7)  | 3887(2)    | 2844.1(18) | 6720.1(17) | 14.6(4)  |
| C(7A) | 4217(2)    | 2804.7(17) | 5619.9(17) | 12.3(4)  |
| C(8)  | 1775(2)    | 1727.1(17) | 4626.2(17) | 11.7(4)  |
| C(9)  | 847(2)     | 2606.0(18) | 4514.7(18) | 15.3(4)  |
| C(10) | 787(3)     | 2984(2)    | 3360(2)    | 24.7(5)  |
| C(11) | 1387(3)    | 3694(2)    | 5417.4(19) | 21.7(5)  |
| C(12) | -653(2)    | 1952(2)    | 4663(2)    | 28.1(5)  |
| C(13) | 4194(2)    | 2000.7(17) | 1241.6(17) | 13.2(4)  |
| C(14) | 3347(2)    | 1321.2(18) | 96.9(17)   | 14.8(4)  |
| C(15) | 3916(2)    | 3215.0(18) | 1359.5(19) | 18.3(4)  |
| C(16) | 5789(2)    | 2090.1(19) | 1249.6(18) | 16.4(4)  |
| C(17) | 4125(2)    | -30.3(17)  | 2695.9(17) | 13.3(4)  |
| C(18) | 3231(2)    | -607.9(19) | 3520.4(19) | 19.7(4)  |
| C(19) | 5711(2)    | 295(2)     | 3225(2)    | 20.3(4)  |
| C(20) | 3875(2)    | -889.4(19) | 1604.6(18) | 18.2(4)  |
| C(92) | 9843(3)    | 3602(2)    | 8300(2)    | 25.9(5)  |
| C(93) | 11326(3)   | 3710(2)    | 8924(3)    | 43.0(8)  |
| C(94) | 11961(4)   | 4946(3)    | 9248(4)    | 60.7(12) |
| C(95) | 11137(3)   | 5527(2)    | 8502(3)    | 33.7(6)  |
| O(91) | 9772.8(18) | 4745.6(16) | 8123.9(17) | 33.1(4)  |

Table 2. Bond lengths [Å] and angles [°] of **3**.

Symmetry transformations used to generate equivalent atoms: #1 -x,-y,-z

|                  |             |                  |            |
|------------------|-------------|------------------|------------|
| Hg-Cl(1)         | 2.4348(5)   | C(7)-C(7A)       | 1.413(3)   |
| Hg-P(1)          | 2.4496(5)   | C(8)-C(9)        | 1.555(3)   |
| Hg-Cl(2)         | 2.5325(5)   | C(9)-C(10)       | 1.524(3)   |
| Hg-Cl(2)#1       | 2.8424(5)   | C(9)-C(11)       | 1.533(3)   |
| P(1)-C(2)        | 1.820(2)    | C(9)-C(12)       | 1.535(3)   |
| P(1)-C(17)       | 1.887(2)    | C(13)-C(16)      | 1.536(3)   |
| P(1)-C(13)       | 1.889(2)    | C(13)-C(14)      | 1.540(3)   |
| N(1)-C(2)        | 1.389(2)    | C(13)-C(15)      | 1.540(3)   |
| N(1)-C(7A)       | 1.389(3)    | C(17)-C(20)      | 1.528(3)   |
| N(1)-C(8)        | 1.479(2)    | C(17)-C(19)      | 1.534(3)   |
| C(2)-P(3)        | 1.740(2)    | C(17)-C(18)      | 1.537(3)   |
| P(3)-C(3A)       | 1.765(2)    | C(92)-O(91)      | 1.433(3)   |
| C(3A)-C(7A)      | 1.409(3)    | C(92)-C(93)      | 1.512(4)   |
| C(3A)-C(4)       | 1.409(3)    | C(93)-C(94)      | 1.448(4)   |
| C(4)-C(5)        | 1.372(3)    | C(94)-C(95)      | 1.478(4)   |
| C(5)-C(6)        | 1.411(3)    | C(95)-O(91)      | 1.416(3)   |
| C(6)-C(7)        | 1.376(3)    |                  |            |
| Cl(1)-Hg-P(1)    | 128.369(18) | P(3)-C(2)-P(1)   | 119.13(11) |
| Cl(1)-Hg-Cl(2)   | 103.925(18) | C(2)-P(3)-C(3A)  | 89.64(9)   |
| P(1)-Hg-Cl(2)    | 122.719(16) | C(7A)-C(3A)-C(4) | 119.81(19) |
| Cl(1)-Hg-Cl(2)#1 | 95.042(17)  | C(7A)-C(3A)-P(3) | 111.40(15) |
| P(1)-Hg-Cl(2)#1  | 110.108(16) | C(4)-C(3A)-P(3)  | 128.73(16) |
| Cl(2)-Hg-Cl(2)#1 | 83.267(16)  | C(5)-C(4)-C(3A)  | 119.61(19) |
| Hg-Cl(2)-Hg#1    | 96.732(16)  | C(4)-C(5)-C(6)   | 120.03(19) |
| C(2)-P(1)-C(17)  | 104.17(9)   | C(7)-C(6)-C(5)   | 122.06(19) |
| C(2)-P(1)-C(13)  | 107.83(9)   | C(6)-C(7)-C(7A)  | 117.94(19) |
| C(17)-P(1)-C(13) | 114.64(9)   | N(1)-C(7A)-C(3A) | 113.05(17) |
| C(2)-P(1)-Hg     | 120.53(6)   | N(1)-C(7A)-C(7)  | 126.39(18) |
| C(17)-P(1)-Hg    | 104.40(6)   | C(3A)-C(7A)-C(7) | 120.55(18) |
| C(13)-P(1)-Hg    | 105.67(6)   | N(1)-C(8)-C(9)   | 115.29(16) |
| C(2)-N(1)-C(7A)  | 112.40(16)  | C(10)-C(9)-C(11) | 108.45(19) |
| C(2)-N(1)-C(8)   | 126.44(16)  | C(10)-C(9)-C(12) | 109.88(19) |
| C(7A)-N(1)-C(8)  | 120.48(16)  | C(11)-C(9)-C(12) | 109.06(18) |
| N(1)-C(2)-P(3)   | 113.40(14)  | C(10)-C(9)-C(8)  | 111.17(17) |
| N(1)-C(2)-P(1)   | 124.91(14)  | C(11)-C(9)-C(8)  | 112.83(17) |

|                   |            |
|-------------------|------------|
| C(12)-C(9)-C(8)   | 105.39(17) |
| C(16)-C(13)-C(14) | 108.65(16) |
| C(16)-C(13)-C(15) | 110.66(17) |
| C(14)-C(13)-C(15) | 107.16(17) |
| C(16)-C(13)-P(1)  | 114.55(14) |
| C(14)-C(13)-P(1)  | 107.97(13) |
| C(15)-C(13)-P(1)  | 107.57(13) |
| C(20)-C(17)-C(19) | 109.61(17) |
| C(20)-C(17)-C(18) | 108.86(17) |
| C(19)-C(17)-C(18) | 109.06(17) |
| C(20)-C(17)-P(1)  | 108.85(14) |
| C(19)-C(17)-P(1)  | 113.94(14) |
| C(18)-C(17)-P(1)  | 106.37(13) |
| O(91)-C(92)-C(93) | 107.0(2)   |
| C(94)-C(93)-C(92) | 105.2(2)   |
| C(93)-C(94)-C(95) | 106.6(2)   |
| O(91)-C(95)-C(94) | 106.7(2)   |
| C(95)-O(91)-C(92) | 109.23(18) |

Table 3. Atomic coordinates ( $\times 10^4$ ) and equivalent isotropic displacement parameters of **4** ( $\text{\AA}^2 \times 10^3$ ).  $U(\text{eq})$  is defined as one third of the trace of the orthogonalized  $U_{ij}$  tensor.

|       | x          | y          | z          | $U(\text{eq})$ |
|-------|------------|------------|------------|----------------|
| Rh    | 3789.8(1)  | 1704.7(1)  | 3573.8(1)  | 22.0(1)        |
| P(1)  | 4438.1(5)  | 2754.1(3)  | 4350.5(3)  | 22.8(1)        |
| N(1)  | 6180.0(16) | 3543.2(9)  | 3159.3(11) | 24.6(3)        |
| C(2)  | 5910.3(17) | 2889.5(10) | 3649.8(12) | 21.3(4)        |
| P(3)  | 5432.9(4)  | 2167.6(3)  | 2857.2(3)  | 19.9(1)        |
| C(3A) | 5165.6(17) | 2858.7(11) | 2022.7(12) | 22.8(4)        |
| C(4)  | 4572.7(19) | 2785.9(13) | 1190.7(13) | 30.3(4)        |
| C(5)  | 4489(2)    | 3380.0(15) | 622.8(15)  | 37.1(5)        |
| C(6)  | 5022(2)    | 4037.6(14) | 887.4(15)  | 35.8(5)        |
| C(7)  | 5620(2)    | 4128.0(12) | 1709.3(14) | 30.4(4)        |
| C(7A) | 5678.6(17) | 3531.2(11) | 2294.6(13) | 23.3(4)        |
| C(8)  | 6915.4(19) | 4143.4(11) | 3541.0(14) | 27.2(4)        |
| C(9)  | 8347(2)    | 4111.5(12) | 3411.1(17) | 35.3(5)        |
| C(10) | 8644(2)    | 4141.8(16) | 2418.8(19) | 48.9(7)        |
| C(11) | 8890(2)    | 4787.7(14) | 3881.4(18) | 42.6(6)        |
| C(12) | 8905(3)    | 3422.9(16) | 3811(3)    | 61.9(9)        |
| C(13) | 5168(2)    | 2612.6(12) | 5502.7(13) | 33.4(5)        |
| C(14) | 5839(3)    | 1877.0(14) | 5469.9(15) | 40.2(5)        |
| C(15) | 4181(3)    | 2585.4(16) | 6228.0(16) | 48.3(6)        |
| C(16) | 6135(3)    | 3198.8(16) | 5756.0(17) | 50.5(7)        |
| C(17) | 3357(2)    | 3567.2(12) | 4284.9(17) | 34.8(5)        |
| C(18) | 2800(3)    | 3574.6(16) | 3337.4(18) | 49.3(7)        |
| C(19) | 2278(2)    | 3465.9(15) | 4935.8(19) | 44.1(6)        |
| C(20) | 3981(3)    | 4300.6(15) | 4488(3)    | 68.1(10)       |
| C(21) | 2653(2)    | 1104.4(15) | 4609.1(15) | 41.1(6)        |
| C(22) | 1858(2)    | 1485.7(14) | 4080.7(18) | 39.9(6)        |
| C(23) | 1091(2)    | 1190.4(15) | 3320.8(18) | 44.5(6)        |
| C(24) | 1764(2)    | 661.8(14)  | 2729.3(16) | 39.4(5)        |
| C(25) | 3129(2)    | 857.2(12)  | 2591.8(15) | 33.4(5)        |
| C(26) | 4086(2)    | 586.7(12)  | 3106.1(17) | 35.1(5)        |
| C(27) | 3949(3)    | 95.1(15)   | 3901(2)    | 48.6(7)        |
| C(28) | 2902(2)    | 299.5(16)  | 4535.6(18) | 47.5(7)        |
| B     | 7506(2)    | 1279.4(14) | 3002.9(16) | 30.0(5)        |

|      |            |           |            |         |
|------|------------|-----------|------------|---------|
| O(1) | 6546.1(13) | 1701.2(7) | 2490.4(9)  | 25.2(3) |
| F(2) | 8202.6(13) | 894.5(8)  | 2394.1(9)  | 41.1(3) |
| F(3) | 8262.1(16) | 1753.9(9) | 3477.7(12) | 55.0(4) |
| F(4) | 6953.7(16) | 807.9(11) | 3593.3(12) | 64.9(5) |

---

Table 4. Bond lengths [Å] and angles [°] of 4.

|                |            |                  |            |
|----------------|------------|------------------|------------|
| Rh-C(26)       | 2.191(2)   | C(9)-C(12)       | 1.515(4)   |
| Rh-C(25)       | 2.244(2)   | C(9)-C(10)       | 1.525(4)   |
| Rh-P(3)        | 2.2448(5)  | C(9)-C(11)       | 1.535(3)   |
| Rh-C(22)       | 2.253(2)   | C(13)-C(14)      | 1.529(4)   |
| Rh-C(21)       | 2.272(2)   | C(13)-C(15)      | 1.530(3)   |
| Rh-P(1)        | 2.3462(5)  | C(13)-C(16)      | 1.535(3)   |
| P(1)-C(17)     | 1.889(2)   | C(17)-C(18)      | 1.527(4)   |
| P(1)-C(13)     | 1.897(2)   | C(17)-C(20)      | 1.530(4)   |
| P(1)-C(2)      | 1.9260(19) | C(17)-C(19)      | 1.536(3)   |
| N(1)-C(7A)     | 1.391(2)   | C(21)-C(22)      | 1.346(4)   |
| N(1)-C(2)      | 1.438(2)   | C(21)-C(28)      | 1.504(4)   |
| N(1)-C(8)      | 1.463(2)   | C(22)-C(23)      | 1.492(4)   |
| C(2)-P(3)      | 1.8429(19) | C(23)-C(24)      | 1.506(4)   |
| P(3)-O(1)      | 1.5745(14) | C(24)-C(25)      | 1.523(3)   |
| P(3)-C(3A)     | 1.7980(19) | C(25)-C(26)      | 1.363(3)   |
| C(3A)-C(4)     | 1.393(3)   | C(26)-C(27)      | 1.502(3)   |
| C(3A)-C(7A)    | 1.407(3)   | C(27)-C(28)      | 1.530(4)   |
| C(4)-C(5)      | 1.383(3)   | B-F(3)           | 1.377(3)   |
| C(5)-C(6)      | 1.388(4)   | B-F(4)           | 1.378(3)   |
| C(6)-C(7)      | 1.385(3)   | B-F(2)           | 1.382(3)   |
| C(7)-C(7A)     | 1.402(3)   | B-O(1)           | 1.488(3)   |
| C(8)-C(9)      | 1.550(3)   |                  |            |
| C(26)-Rh-C(25) | 35.77(9)   | C(21)-Rh-P(1)    | 102.53(7)  |
| C(26)-Rh-P(3)  | 94.70(6)   | C(17)-P(1)-C(13) | 113.37(11) |
| C(25)-Rh-P(3)  | 100.93(6)  | C(17)-P(1)-C(2)  | 112.17(9)  |
| C(26)-Rh-C(22) | 94.59(9)   | C(13)-P(1)-C(2)  | 100.66(9)  |
| C(25)-Rh-C(22) | 79.45(9)   | C(17)-P(1)-Rh    | 116.50(8)  |
| P(3)-Rh-C(22)  | 164.03(7)  | C(13)-P(1)-Rh    | 116.79(7)  |
| C(26)-Rh-C(21) | 81.20(9)   | C(2)-P(1)-Rh     | 94.22(6)   |
| C(25)-Rh-C(21) | 86.82(9)   | C(7A)-N(1)-C(2)  | 112.56(16) |
| P(3)-Rh-C(21)  | 160.68(7)  | C(7A)-N(1)-C(8)  | 124.75(16) |
| C(22)-Rh-C(21) | 34.61(10)  | C(2)-N(1)-C(8)   | 122.68(16) |
| C(26)-Rh-P(1)  | 151.93(7)  | N(1)-C(2)-P(3)   | 109.05(12) |
| C(25)-Rh-P(1)  | 168.24(6)  | N(1)-C(2)-P(1)   | 124.05(14) |
| P(3)-Rh-P(1)   | 72.490(17) | P(3)-C(2)-P(1)   | 92.17(8)   |
| C(22)-Rh-P(1)  | 104.14(7)  | O(1)-P(3)-C(3A)  | 104.62(8)  |

|                   |            |                   |            |
|-------------------|------------|-------------------|------------|
| O(1)-P(3)-C(2)    | 114.33(8)  | C(23)-C(22)-Rh    | 107.71(16) |
| C(3A)-P(3)-C(2)   | 88.80(9)   | C(22)-C(23)-C(24) | 114.7(2)   |
| O(1)-P(3)-Rh      | 124.52(6)  | C(23)-C(24)-C(25) | 113.6(2)   |
| C(3A)-P(3)-Rh     | 118.84(6)  | C(26)-C(25)-C(24) | 123.4(2)   |
| C(2)-P(3)-Rh      | 100.05(6)  | C(26)-C(25)-Rh    | 70.01(13)  |
| C(4)-C(3A)-C(7A)  | 120.74(18) | C(24)-C(25)-Rh    | 111.47(15) |
| C(4)-C(3A)-P(3)   | 128.08(17) | C(25)-C(26)-C(27) | 125.6(2)   |
| C(7A)-C(3A)-P(3)  | 111.15(14) | C(25)-C(26)-Rh    | 74.22(13)  |
| C(5)-C(4)-C(3A)   | 119.8(2)   | C(27)-C(26)-Rh    | 106.97(18) |
| C(4)-C(5)-C(6)    | 119.2(2)   | C(26)-C(27)-C(28) | 115.3(2)   |
| C(7)-C(6)-C(5)    | 122.5(2)   | C(21)-C(28)-C(27) | 114.7(2)   |
| C(6)-C(7)-C(7A)   | 118.4(2)   | F(3)-B-F(4)       | 108.7(2)   |
| N(1)-C(7A)-C(7)   | 125.47(19) | F(3)-B-F(2)       | 110.11(19) |
| N(1)-C(7A)-C(3A)  | 115.11(17) | F(4)-B-F(2)       | 110.2(2)   |
| C(7)-C(7A)-C(3A)  | 119.39(18) | F(3)-B-O(1)       | 109.33(19) |
| N(1)-C(8)-C(9)    | 116.67(17) | F(4)-B-O(1)       | 110.82(18) |
| C(12)-C(9)-C(10)  | 109.0(2)   | F(2)-B-O(1)       | 107.59(18) |
| C(12)-C(9)-C(11)  | 110.4(2)   | B-O(1)-P(3)       | 128.56(13) |
| C(10)-C(9)-C(11)  | 109.4(2)   |                   |            |
| C(12)-C(9)-C(8)   | 111.44(19) |                   |            |
| C(10)-C(9)-C(8)   | 110.3(2)   |                   |            |
| C(11)-C(9)-C(8)   | 106.22(19) |                   |            |
| C(14)-C(13)-C(15) | 109.0(2)   |                   |            |
| C(14)-C(13)-C(16) | 108.1(2)   |                   |            |
| C(15)-C(13)-C(16) | 108.6(2)   |                   |            |
| C(14)-C(13)-P(1)  | 106.09(14) |                   |            |
| C(15)-C(13)-P(1)  | 111.76(18) |                   |            |
| C(16)-C(13)-P(1)  | 113.13(16) |                   |            |
| C(18)-C(17)-C(20) | 109.8(3)   |                   |            |
| C(18)-C(17)-C(19) | 107.7(2)   |                   |            |
| C(20)-C(17)-C(19) | 108.1(2)   |                   |            |
| C(18)-C(17)-P(1)  | 106.45(16) |                   |            |
| C(20)-C(17)-P(1)  | 114.73(18) |                   |            |
| C(19)-C(17)-P(1)  | 109.84(17) |                   |            |
| C(22)-C(21)-C(28) | 125.3(2)   |                   |            |
| C(22)-C(21)-Rh    | 71.89(13)  |                   |            |
| C(28)-C(21)-Rh    | 109.13(16) |                   |            |
| C(21)-C(22)-C(23) | 126.3(2)   |                   |            |
| C(21)-C(22)-Rh    | 73.49(13)  |                   |            |
